# Supplementary material for: Examining clinical similarities between myalgic encephalomyelitis/chronic fatigue syndrome and d-lactic acidosis: a systematic review
Source: PubMed Central journal article supplement (PMC5463382; doi:10.1186/s12967-017-1229-1), 2017-06-07
Supplement: 12967_2017_1229_MOESM2_ESM.pdf [file 12967_2017_1229_MOESM2_ESM.pdf]

## Supplementary Information for

### Examining Clinical Similarities between Myalgic Encephalomyelitis/Chronic Fatigue

#### Syndrome and D-Lactic Acidosis: A Systematic Review

Amy Wallis<sup>1</sup>, Michelle Ball<sup>1</sup>, Sandra McKechnie<sup>2</sup>, Henry Butt<sup>3</sup>, Donald P Lewis<sup>4</sup> & Dorothy Bruck<sup>1</sup>

<sup>1</sup>Psychology Discipline, Victoria University, Victoria, Australia.

<sup>2</sup>College of Engineering & Science, Victoria University, Victoria, Australia.

<sup>3</sup>Bioscreen (Aust) Pty Ltd, Victoria, Australia.

<sup>4</sup>CFS Discovery Clinic, Donvale, Victoria, Australia.

#### ***This PDF file includes:***

**Supplementary Table 2.** Episodes that reported *matching* or *ambiguous/other* D-lactic acidosis (D-la) symptoms as a function of age and sex.

#### ***Other supplementary material for this manuscript includes the following:***

**Additional file 1: Supplementary Table 1** (excel file) Demographic and clinical data summary of D-lactic acidosis episodes ( $n = 59$ ) included in the qualitative synthesis.

*Legend:* All episodes simultaneously reported at least one high D-lactate level (from blood or urine analysis) and documented neurological symptoms. Episodes were screened for information about patient demographics, neurological symptoms, non-neurological symptoms, D-lactate levels, L-lactate levels, anion gap, pH levels, microbial composition, proposed triggers, medical history/comorbid conditions and treatment. Numbers in brackets (1) and (2) indicate separate episodes for the same patient. The letters *a* and *b* identify different patient cases reported in the same reference. Episodes from non-SBS patients are marked with an asterisk (\*).

SIMILARITIES BETWEEN ME/CFS AND D-LACTIC ACIDOSIS

**Supplementary Table 2.** Episodes that reported *matching* or *ambiguous/other* D-lactic acidosis (D-la) symptoms as a function of age and sex.

| ME/CFS<br>ICC                                       | D-la <sub>b</sub> symptom<br>overlap with<br>ME/CFS | Episode Case Numbers    |                 |        |                    |                                            |                                            |
|-----------------------------------------------------|-----------------------------------------------------|-------------------------|-----------------|--------|--------------------|--------------------------------------------|--------------------------------------------|
|                                                     |                                                     | Paediatric (≤ 17 years) |                 |        | Adult (≥ 18 years) |                                            |                                            |
|                                                     |                                                     | Male                    | Female          | NI     | Male               | Female                                     |                                            |
| A.<br>Postexertional<br>neuroimmune<br>exhaustion   | Matching                                            | 14, 48, 50, 66,         | 40              | -      | 36, 42             | 12b, 13, 58b,                              |                                            |
|                                                     |                                                     | 53, 8, 47a, 47b         |                 |        |                    | 39                                         |                                            |
|                                                     | Ambiguous/other                                     | -                       | -               | -      | -                  | -                                          |                                            |
| B.<br>Neurological<br>impairments                   | Matching                                            | 48, 47a, 30,            | 37, 17, 51b,    | 11     | 12a, 10, 29,       | 6, 16 <sub>1</sub> , 16 <sub>2</sub> , 65, |                                            |
|                                                     |                                                     | 19, 52, 56, 66,         | 4, 40, 35       |        | 44, 58a, 25,       | 20, 34 <sub>2</sub> , 57,                  |                                            |
|                                                     |                                                     | 43, 53, 14, 50,         |                 |        | 24, 49, 64, 59,    | 28, 41, 58b,                               |                                            |
|                                                     |                                                     | 8                       |                 |        | 25, 42, 62, 9,     | 60, 21, 12b,                               |                                            |
|                                                     |                                                     |                         |                 |        | 15, 23, 27, 33     | 13, 34 <sub>1</sub>                        |                                            |
|                                                     |                                                     | Ambiguous/other         | 43, 56, 66, 14, | 35, 37 | 11                 | 9, 29, 44, 58a,                            | 57, 21, 13, 31,                            |
|                                                     |                                                     |                         | 18, 51a, 8, 19, |        |                    | 42, 64, 15, 24,                            | 39, 58b, 43 <sub>2</sub> ,                 |
|                                                     |                                                     |                         | 48, 53, 30      |        |                    | 25, 49, 55, 23,                            | 6, 16 <sub>1</sub> , 16 <sub>2</sub> , 65, |
|                                                     |                                                     |                         |                 |        |                    | 26, 10, 62, 27,                            | 20, 34 <sub>1</sub> , 12b                  |
|                                                     |                                                     |                         |                 |        |                    | 33                                         |                                            |
|                                                     | Ambiguous/other<br>B1-B4                            | 43, 56, 66              | 35              | 11     | 9, 29, 44, 58a,    | 57, 21, 13, 31,                            |                                            |
|                                                     |                                                     |                         |                 |        | 42, 64, 15, 24,    | 39, 58b                                    |                                            |
|                                                     |                                                     |                         |                 |        | 25, 49, 33         |                                            |                                            |
|                                                     | Speech/Language                                     | 14, 48, 66, 53,         | 37, 35          | 11     | 10, 15, 44, 62,    | 6, 16 <sub>1</sub> , 16 <sub>2</sub> , 65, |                                            |
|                                                     |                                                     | 8, 30, 19               |                 |        | 64, 9, 23, 25,     | 20, 34 <sub>1</sub> , 57,                  |                                            |
|                                                     |                                                     |                         |                 |        | 58a, 27, 33        | 21, 12b                                    |                                            |
|                                                     | Consciousness                                       | 14, 18, 51a, 8,         | -               | -      | 55, 9, 23, 26,     | 34 <sub>2</sub> , 57, 21                   |                                            |
|                                                     |                                                     | 19                      |                 |        | 49                 |                                            |                                            |
| C. Immune,<br>gastrointestinal<br>and genitourinary | Matching                                            | 50, 47b, 66             | -               | -      | 10, 62, 42, 44,    | 16 <sub>2</sub> , 60, 16 <sub>1</sub> ,    |                                            |
|                                                     |                                                     |                         |                 |        | 36, 15             | 65                                         |                                            |
|                                                     | Ambiguous/other                                     | -                       | -               | -      | -                  | -                                          |                                            |

## SIMILARITIES BETWEEN ME/CFS AND D-LACTIC ACIDOSIS

|                                              |                 |                                                       |              |    |                                                                             |                                                                                                        |
|----------------------------------------------|-----------------|-------------------------------------------------------|--------------|----|-----------------------------------------------------------------------------|--------------------------------------------------------------------------------------------------------|
| <b>D. Energy</b>                             | Matching        | 56, 66, 48,                                           | 51b, 17, 35  | -  | 55, 42, 25, 49,                                                             | 60, 39                                                                                                 |
| production/<br>transportation<br>impairments |                 | 51a, 52, 8, 43,<br>19                                 |              |    | 9, 29, 62                                                                   |                                                                                                        |
|                                              | Ambiguous/other | -                                                     | -            | -  | 42, 23                                                                      | -                                                                                                      |
| <b>Mood /</b>                                | Matching        | 52, 53                                                | 40           | -  | 9, 10                                                                       | 60, 31, 16 <sub>2</sub>                                                                                |
| <b>Behavior</b>                              | Ambiguous/other | 50, 56, 30, 66,<br>53, 19                             | -            | -  | 44, 58a, 62, 33                                                             | 31, 58b, 20                                                                                            |
| <b>Uncategorized D-la Symptoms</b>           |                 |                                                       |              |    |                                                                             |                                                                                                        |
|                                              | Metabolic       | 14, 18, 48, 50,                                       | 35, 51b, 37, | 11 | 10, 15, 29, 44,                                                             | 6, 12b, 16 <sub>1</sub> ,                                                                              |
|                                              | acidosis        | 51a, 52, 66,<br>53, 56, 8, 43,<br>47a, 47b, 30,<br>19 | 40, 4, 17    |    | 55, 62, 64, 9,<br>12a, 23, 24,<br>25, 26, 49,<br>58a, 59, 27,<br>36, 42, 33 | 16 <sub>2</sub> , 60, 65,<br>13, 20, 31,<br>34 <sub>1</sub> , 34 <sub>2</sub> , 57,<br>58b, 21, 28, 41 |
|                                              | Other           | 66, 43, 47a,                                          | -            | -  | 9, 2, 15, 26,                                                               | 16 <sub>1</sub> , 58b                                                                                  |
|                                              | abnormalities   | 47b                                                   |              |    | 59, 33                                                                      |                                                                                                        |

*ambiguous/other*: symptoms that were not clearly identified as consistent with ME/CFS presentation (see Table 2 for detailed symptom delineation); D-la: D-lactic acidosis; ICC: International Consensus Criteria; *matching*: mapped overlap between ME/CFS and D-la symptoms; ME/CFS: myalgic encephalomyelitis/chronic fatigue syndrome; NI: sex not identified.

*Legend*. Subscript numbers (1 and 2) indicate separate episodes for the same patient. The letters *a* and *b* identify different patient cases reported in the same reference. ME/CFS broad category B. Neurological impairments are highlighted as the primary focus of this review and to show three subcategories of delineation under *ambiguous/other* symptoms (i.e., in accordance with specific ICC criteria (B1 – B4), speech/language symptoms, and level of consciousness; see Table 2). Therefore, the same episode code number can be shown several times to represent multiple symptoms during each D-la episode (see Table 1 for references). Descriptions of drunkenness were referred to in several studies. Adult males self-reported *feeling* “drunk” (12a, 27) whereas females were described as *appearing* “drunk” (16<sub>1</sub>, 16<sub>2</sub>, 20,

## SIMILARITIES BETWEEN ME/CFS AND D-LACTIC ACIDOSIS

58b). Rather than using this ambiguous term, the specific symptoms that were also referred to in each of these studies were categorized in the table. See Table 3 for a summary of symptom frequencies.
